# Supplementary material for: Genetic and Antigenic Characterization of Enterovirus 71 in Ho Chi Minh City, Vietnam, 2011
Source: PLoS One. 2013 Jul 29;8(7):e69895. doi: 10.1371/journal.pone.0069895 (PMC3726754; doi:10.1371/journal.pone.0069895)
Supplement: Table S2 — (DOC) [file pone.0069895.s002.doc]

Supplemental Table S2. Primers used for EV71VP1 and complete genome amplification and sequencing.

| Primer | Positiona | Sequence (5'-3') b | Target region | Polarity |
| --- | --- | --- | --- | --- |
| EV71VP1 amplification and sequencing | | | | |
| EV71-F1-VP3cd | 2217-2236 | ATWCCATGGATCAGYAAYAC | VP3 | sense |
| EV71-R1-2Acd | 3553-3534 | CTGACYGGRTAGTGYTTTCT | 2A | antisense |
| EV71 complete genome amplification and sequencing | | | | |
| EV-5UTR-34Fcde | 34-52 | GGCCCACTGGGCGCTAGCA | 5’-UTR | sense |
| EV-5UTR-541Fcd | 544-568 | GACTACTTTGGGTGTCCGTGTTTCC | 5’-UTR | sense |
| EV-5UTR-503Rcd | 505-529 | GTTACCCGTTACGACACACTACCCG | 5’-UTR | antisense |
| EV-5UTR-355Fcd | 375-396 | CCTGCCCATGGAGAAATCCATG | 5’-UTR | sense |
| EV-5UTR-854Rcd | 851-872 | TTTGCCTGCTGTGGCGGCATAG | 5’-UTR | antisense |
| EV71-633Fcd | 633-653 | TGGYCATCCRGTGTSHAYCAG | 5’-UTR | sense |
| EV71-3540Rcd | 3553-3534 | CTGACYGGRTAGTGYTTTCT | 2A | antisense |
| EV71S-1443Fd | 1443-1462 | GTGCTCGAYGCTGGBATYCC | VP2 | sense |
| EV71-3024Fcd | 3025-3044 | CACCTGCGAGTGCTTATCAA | VP1 | sense |
| EV71-5838Rcd | 5839-5820 | ACCACTCCTCCACACTGTCC | 3C | antisense |
| EV71-3743Fd | 3722-3739 | TGAGGGATCTYYTGTGGT | 2A | sense |
| EV71S-4428Fd | 4428-4447 | CACCGWATTGAACCTGTRTG | 2C | sense |
| EV9-5131Fcd | 5128-5151 | GCGATCTCCTCGCTAGTGTAGATA | 3A | sense |
| EV71-7410Rcd | 7391-7408 | GCTATTCTGGTTATAACA | 3’-UTR | antisense |
| EV71S-5790Fd | 5790-5806 | ACYATGATGTAYAAYTT | 3C | sense |
| EV71S-6297Fd | 6297-6316 | AGYGCHYTDGGYATMAAGAA | 3C | sense |
| Oligo-Tc | 7049~ | This primer contains 12-18 dT bases. | Poly-A tail | antisense |

a The positions of primers are those relative to the genome of EV71 BrCr (GenBank accession number U22521).

b Degenerate bases followed nucleotide IUB codes.

c RT-PCR primer

d Sequencing primer

e Published by Wang et al in J Clin Microbiol, 2002
